# Supplementary material
Source: PubMed Central journal article supplement (PMC1636525)
Supplement: pnas_0608243103_1.pdf [file pnas_0608243103_1.pdf]

## Supporting Text

**Spectral Subtractions.** In the text we referred to the absorptive difference spectrum:  $(G_{79}^* + G_{79}^{**}) - 0.25G_{79}^{**}$ . The pump-probe spectra were independently measured for each sample and used to obtain the complex absorptive spectrum of  $G_{79}^* + G_{79}^{**}$  and of the homodimer  $G_{79}^{**}$ . The real parts of these spectra are plotted in Figs. 4d and 4c. Because the isotopomer pump-probe spectra were so weak there was an uncertainty of  $\approx 0.06\pi$  in the phase of these absorptive spectra. The helix concentrations of the various samples were not precisely equal ( $\pm 20\%$ ) and normalization was uncertain. The spectrum of  $G_{79}^{**}$  was subtracted from that of  $G_{79}^* + G_{79}^{**}$  until the  $^{13}\text{C}=\text{}^{18}\text{O}$  diagonal absorption region intensity was reduced by 50%, which required between 0.22 and 0.28 of the  $G_{79}^{**}$  spectrum for a series of samples, rather than the ideal fraction of 0.25 for perfectly normalized signals. The  $G_{79}^{**}$  spectrum used in the indicated subtraction was obtained for a range of small (few percent) phase corrections to ensure that the imbalance between positive and negative contributions in the difference spectrum was minimized when averaged across the complete spectral window (1,500–1,700  $\text{cm}^{-1}$ ). This overall procedure for all phase choices and for all samples gave very similar basic spectral characteristics in the isotopomer region, including the cross-peak, as by simply subtracting 25% of the real part of the  $G_{79}^{**}$  spectrum. There are more significant variations in the main helix band region of 1,620–1,670  $\text{cm}^{-1}$ . The resulting difference spectrum is pure heterodimer in the  $^{13}\text{C}=\text{}^{18}\text{O}$  region but not at  $^{13}\text{C}=\text{}^{16}\text{O}$ , which maintains 25% of the  $G_{79}^*$  intensity. However, the procedure we used does subtract  $\approx 25\%$  of the  $^{13}\text{C}=\text{}^{16}\text{O}$  natural abundance peak. The additional  $G_{79}^*$  contribution was not subtracted.

**Polarization Measurement.** In the polarization measurements, we obtained the  $\langle xxx \rangle$  and  $\langle yyy \rangle$  echo signals of both the homodimer sample  $G_{79}^{**}$  and the mixture sample  $G_{79}^* + G_{79}^{**}$ . The difference absorptive spectrum of  $(G_{79}^* + G_{79}^{**}) - 0.25G_{79}^{**}$  was calculated for

each of the two polarizations according to the above-mentioned procedure. For each 2D absorptive spectrum  $\underline{S}(\omega_\tau, \omega_t)$  a spectral slice was chosen as follows:

$\int_{-\infty}^{\infty} \text{Re}[\underline{S}(\omega_\tau, \omega_t)]G(\omega_\tau)d\omega_\tau$  where  $G(\omega_\tau)$  is a Gaussian profile centered at  $\omega_\tau = \omega_{^{13}\text{C}=^{18}\text{O}}$  having full width at half maximum of  $12 \text{ cm}^{-1}$ . This slice was subsequently least-squares fitted to a series of overlapping spectral bands along the  $\omega_t$  axis in the region of  $1,574\text{--}1,655 \text{ cm}^{-1}$  (Fig. 5a gives an example) to obtain the  $^{13}\text{C}=^{18}\text{O}$  diagonal peak contribution and the cross peak between the two isotopomer levels solely from the pure heterodimers  $G_{79}^{**}/G_{79}^*$  and  $G_{79}^*/G_{79}^{**}$ .

**The Dipole–Dipole Angular Factor.** The factor  $\kappa(\Omega)$  in the text is defined by:

$$\kappa(\theta_1, \theta_2, \phi_1, \phi_2) = \hat{\mu}_1 \cdot \hat{\mu}_2 - 3\hat{\mu}_1 \cdot \hat{y} \hat{\mu}_2 \cdot \hat{y} \quad [1]$$

where  $\theta_1, \phi_1$  and  $\theta_2, \phi_2$  are the polar angles of the two dipole vectors and  $\hat{y}$  is the unit line joining them, then:

$$\hat{\mu}_i = \cos \theta_i \hat{z}_i + \sin \theta_i (\cos \phi_i \hat{x}_i + \sin \phi_i \hat{y}_i) \quad [2]$$

If the two dipoles are interchangeable by a twofold axis parallel to  $\hat{z}$  it is found that:  $\cos \theta_1 = \cos \theta_2$ ;  $\sin \theta_1 = \sin \theta_2$ ;  $\cos \phi_1 = -\cos \phi_2$ ; and  $\sin \phi_1 = -\sin \phi_2$ . The two-fold axis implies that  $\phi_2 = \phi_1 + \pi$  so that by defining  $\hat{\mu}_1 \cdot \hat{\mu}_2 = \cos \theta_{12}$  and replacing  $\phi_i$  by  $\phi$ , after some manipulation and defining  $2P_2(\cos \phi) = (3 \cos^2 \phi - 1)$  yields the equation quoted in the text:

$$\kappa(\theta_{12}, \phi) = 1 + (\cos \theta_{12} - 1)P_2(\cos \phi) \quad [3]$$

**The Relationship Between  $\theta_{12}$  and the Crossing Angle.** The dipole 1 makes an angle  $\beta$  with the A helix axis  $\hat{z}_A$  thus:

$$\hat{\mu}_1 = \cos \beta \hat{z}_A + \sin \beta (\cos \phi_A \hat{x}_A + \sin \phi_A \hat{y}_A) \quad [4]$$

where  $\hat{y}_A$  and  $\hat{y}_B$  (for helix B) form a plane with the twofold axis, which interchanges them, whereas  $\hat{x}_A$  and  $\hat{x}_B$  are perpendicular to this plane. In this picture each dipole is located on the surface of a cone whose axis is the relevant helix axis (i.e., 1 on A and 2 on B). These definitions lead to:  $\hat{y}_A \cdot \hat{y}_B = -\cos \theta_{AB}$ ;  $\hat{x}_A \cdot \hat{x}_B = -1$ ;  $\hat{z}_A \cdot \hat{z}_B = \cos \theta_{AB}$ ;  $\hat{z}_A \cdot \hat{y}_B = \hat{z}_B \cdot \hat{y}_A = \sin \theta_{AB}$ ; and  $\phi_A = \phi_B = \phi_H$ , where  $\theta_{AB}$  is the dihedral or crossing angle between the two helices considered to be perfect  $\alpha$ -helices for the five residues at the crossing region. The angles  $\theta_{12}$  and  $\beta$  are then related to the helix crossing angle and the azimuth of a dipole  $\phi_H$  around its helix axis as follows:

$$\cos \theta_{12} = \cos \theta_{AB} (\cos^2 \beta - \sin^2 \beta \sin^2 \phi_H) + \sin \theta_{AB} \sin 2\beta \sin \phi_H - \sin^2 \beta \cos^2 \phi_H \quad [5]$$

This is the relationship used in the discussion of the crossing angle.

**Determination of the Azimuthal Range of Angles  $\phi_H$  from NMR Data.** A helix axis segment is generated for the four consecutive amino acids [78–81] that include residue Gly-79. The cross product of the unit vectors created by the bisectors of the angles formed by the first three  $\alpha$ -carbons ( $C_{\alpha 1}$ ,  $C_{\alpha 2}$ ,  $C_{\alpha 3}$ ) and the second three  $\alpha$ -carbons ( $C_{\alpha 2}$ ,  $C_{\alpha 3}$ ,  $C_{\alpha 4}$ ) gives the direction cosines of the local helix axis ( $\hat{z}_A$  or  $\hat{z}_B$ ). From the NMR atomic coordinates of the GpA TM helix dimer (1), the two amide-I transition dipole vectors ( $\hat{\mu}_1$  and  $\hat{\mu}_2$ ) at Gly-79 were obtained by assuming the dipole tilts  $20^\circ$  from the carbonyl bond toward the C–N bond in the plane of the peptide group. The dyad axis unit vector is  $\hat{C}_2 = (\hat{\mu}_1 + \hat{\mu}_2) / |\hat{\mu}_1 + \hat{\mu}_2|$ , which locates the  $\hat{y}_A$  axis. The angle between the dipole on helix A and  $\hat{z}_A$  is  $\beta_A = \arccos(\hat{\mu}_1 \cdot \hat{z}_A)$ , and the azimuthal angle  $\phi_A = \arcsin[(\hat{\mu}_1 \cdot \hat{y}_A) / \sin \beta_A]$ . The same analysis can be applied to helix B for the 20 model structures reported for 1AFO (1). We find  $\beta_A = \beta_B = \beta = 30 \pm 1^\circ$ . In the estimate of

the crossing angle, we used  $\beta = 32^\circ$  and  $\theta_{12} = 108^\circ$  as indicated in the text. The azimuthal angles are  $\phi_A = \phi_B = \phi_H = -73 \pm 7^\circ$ .

1. MacKenzie KR, Prestegard JH, Engelman DM (1997) *Science* 276:131–133.
